# Supplementary material for: Topical and Intralesional Immunotherapy for the Management of Skin Cancer in Special Locations: Lips and Eyelids
Source: MDPI journal article supplement (doi:10.3390/cancers15205018), 2023-10-17
Supplement: s1 [file s1]

**Supplementary materials:****Table S1: Studies using topical and intralesional therapy for perioral cutaneous cancer (including actinic cheilitis, lip squamous cell carcinoma and perioral lentigo maligna).**

| <b>Topical therapy in perioral cutaneous cancer</b> |                                       |                      |                       |                                         |                                 |                               |                                |                   |                                                         |
|-----------------------------------------------------|---------------------------------------|----------------------|-----------------------|-----------------------------------------|---------------------------------|-------------------------------|--------------------------------|-------------------|---------------------------------------------------------|
| <b>Topical therapy for actinic cheilitis</b>        |                                       |                      |                       |                                         |                                 |                               |                                |                   |                                                         |
| <b>Therapeutic modality</b>                         | <b>References</b>                     | <b>Type of study</b> | <b>N° of patients</b> | <b>Initial regimen</b>                  | <b>Clinical clearance</b>       | <b>Histological clearance</b> | <b>Mean follow-up (months)</b> | <b>Recurrence</b> | <b>Comments</b>                                         |
| <b>IMI</b>                                          | Husein-El Ahmed et al, 2019[1,5,9,10] | Clinical trial       | 10                    | IMI 5% thrice a week for 4 weeks        | CR: 50%<br>PR: 40%<br>NR: 10%   | N/A                           | 8.7                            | 0                 | Patient satisfaction index: 5.4/10.                     |
|                                                     | Smith et al, 2002[5,6,9]              | Retrospective study  | 15                    | IMI 5% thrice a week for up to 6 weeks  | CR: 100% (at 4 weeks after end) | N/A                           | 7.3                            | 0                 | Additional treatment duration may not be more effective |
|                                                     | McDonald et al, 2010[6,10]            | Retrospective study  | 5                     | IMI 5% 5 times a week for up to 6 weeks | CR: 100%                        | CR: 100%                      | 1                              | -                 | -                                                       |
|                                                     | Spyridonos et al, 2014[6]             | Prospective study    | 8                     | IMI 5% once daily for 5 weeks           | CR: 62,5%<br>PR: 37,5%          | N/A                           | 6                              | -                 | -                                                       |
| <b>5-FU</b>                                         | Epstein, 1977[5,9]                    | Prospective study    | 12                    | 5-FU 5% 3-4 times a day                 | CR: 100%                        | N/A                           | 22                             | 16.7%             | -                                                       |

|                     |                           |                                |     |                                                |                              |                 |      |       |                                                         |
|---------------------|---------------------------|--------------------------------|-----|------------------------------------------------|------------------------------|-----------------|------|-------|---------------------------------------------------------|
|                     |                           |                                |     | for a mean of 12 days                          |                              |                 |      |       |                                                         |
|                     | Robinson et al, 1989[5,9] | Prospective study              | 10  | 5-FU 5% thrice a day for 4 weeks               | N/A                          | N/A             | 50   | 50%   | Recurrences proven by biopsy                            |
|                     | Warnock et al, 1981[9]    | Prospective study              | 6   | 5-FU 1% Twice a day for 2-3 weeks              | CR: 100%                     | PR: 83% NR: 16% | 1-2  | -     | Biopsy taken after post-treatment inflammation subsided |
| <b>PDT</b>          | Bakirtzi et al, 2021[9]   | Systematic review (13 studies) | 241 | Daylight, ALA or MAL-PDT over 1-6 sessions     | CR: 66.7%                    | CR: 49.5%       | 14.8 | 14.1% | Discontinuation rate: 5.9%                              |
|                     | Lai et al, 2020[10]       | Systematic review (18 studies) | 257 | Daylight, ALA or MAL-PDT over 1-6 sessions     | CR: 68.9% PR: 27.6% NR: 8.3% | CR: 42.5%       | 11.1 | 12.6% | Discontinuation rate: 6.2%                              |
| <b>Daylight PDT</b> | Fai et al, 2015[9]        | Prospective study              | 10  | 2 sessions of daylight MAL-PDT 1-2 weeks apart | CR: 70%                      | N/A             | 7    | 28.6% | -                                                       |
|                     | Lai et al, 2020[10]       | Systematic review (3 studies)  | 23  | Daylight MAL-PDT over a mean                   | CR: 82.6% PR: 9.1%           | CR: 100%        | 20.5 | 13%   | -                                                       |

|                           |                                              |                                |    |                                                                      |                               |                           |     |       |                                                        |
|---------------------------|----------------------------------------------|--------------------------------|----|----------------------------------------------------------------------|-------------------------------|---------------------------|-----|-------|--------------------------------------------------------|
|                           |                                              |                                |    | of 2.5 sessions                                                      |                               |                           |     |       |                                                        |
|                           | Andreadis et al, 2020[13]                    | Prospective study              | 22 | 2 sessions of daylight MAL-PDT a week apart                          | CR: 81.8%<br>PR: 9.1%         | N/A                       | 12  | 11.1% | Painless in 80% of cases. 2 patients lost to follow-up |
|                           | Levi et al, 2019 [9,14]                      | Prospective study              | 11 | Daylight MAL-PDT over a mean of 2 sessions                           | CR: 91%                       | CR: 100% (45% biopsied)   | 30  | 10%   | -                                                      |
| <b>Laser-mediated PDT</b> | Bakirtzi et al, 2021[9]; Lai et al, 2020[10] | Systematic reviews (2 studies) | 33 | ALA-dye 595 and MAL-Er:YAG up to 3 sessions                          | CR: 75.8%<br>PR: 10.5%        | N/A                       | 7.5 | 6.1%  | -                                                      |
| <b>PDT + imiquimod 5%</b> | Sotiriou et al, 2011 [10,16]                 | Prospective study              | 34 | 2 MAL-PDT 2 weeks apart followed by IMI 5% thrice a week for 4 weeks | CR: 90%<br>PR: 10%            | CR: 73% (after 12 months) | 12  | 11.1% | 4 patients lost to follow-up                           |
| <b>IM</b>                 | Husein-El Ahmed et al, 2019 [1,5,9]          | Clinical trial                 | 10 | IM 0.015% on 3 consecutive days                                      | CR: 40%<br>PR: 30%<br>NR: 30% | N/A                       | 6   | 0     | Non-inferior to IMI 5% and shorter posology            |
|                           | Flórez et al, 2017 [5,9,17]                  | Case series                    | 7  | IM 0.015% on 3 consecutive days                                      | CR: 42.9%<br>PR: 57.1%        | N/A                       | 2   | -     | Partial responses represented an improvement           |

|                   |                                     |                               |    |                                             |                                 |                      |     |     |                                                                                                                                |
|-------------------|-------------------------------------|-------------------------------|----|---------------------------------------------|---------------------------------|----------------------|-----|-----|--------------------------------------------------------------------------------------------------------------------------------|
|                   |                                     |                               |    |                                             |                                 |                      |     |     | over 75% from basal.                                                                                                           |
|                   | Rossini et al, 2021 [5,18]          | Prospective study             | 14 | IM 0.015% on 3 consecutive days             | CR: 0%<br>PR: 100%              | CR: 0%               | 2   | -   | While objective clinical or histological complete response was not achieved, subjective improvement was noted in all patients. |
|                   | Lai et al, 2020[10]                 | Systematic review (5 studies) | 25 | IM 0.015% on 3 consecutive days             | CR: 52%<br>PR: 38.1%<br>NR: 30% | N/A                  | 5.2 | 25% | -                                                                                                                              |
| <b>Diclofenac</b> | Husein-El Ahmed et al, 2019 [1,5,9] | Clinical trial                | 10 | Diclofenac 3% twice daily for 6 weeks       | CR: 20%<br>PR: 40%<br>NR: 40%   | N/A                  | 6   | 0   | -                                                                                                                              |
|                   | Lima et al, 2010[5,9]               | Prospective study             | 27 | Diclofenac 3% twice daily for 1 to 6 months | CR: 44%<br>PR: 56%              | CR: 0% (15 patients) | 4.7 | -   | Those who were biopsied were those with clinical partial response                                                              |
|                   | Gonzaga et al, 2018[5,9]            | Prospective study             | 31 | Diclofenac 3% thrice                        | CR: 66.7%<br>PR: 20%            | N/A                  | 6   | 0   | 12 lost to follow up.                                                                                                          |

|                                                                                         |                         |                               |                | daily for 3 months                                                                              |                    |                        |                  |            | 5 interrupted treatment due to adverse effects.<br>2 prolonged 30 additional days |
|-----------------------------------------------------------------------------------------|-------------------------|-------------------------------|----------------|-------------------------------------------------------------------------------------------------|--------------------|------------------------|------------------|------------|-----------------------------------------------------------------------------------|
|                                                                                         | Bakirtzi et al, 2021[9] | Systematic review (4 studies) | 62             | Diclofenac 3% twice daily for 1 to 6 months                                                     | CR: 45.2%          | N/A                    | 4.4              | 6.5%       | -                                                                                 |
| <b>Topical and intralesional therapy in invasive squamous cell carcinoma of the lip</b> |                         |                               |                |                                                                                                 |                    |                        |                  |            |                                                                                   |
| Therapeutic modality                                                                    | References              | Type of study                 | N° of patients | Initial regimen                                                                                 | Clinical clearance | Histological clearance | Mean follow-up   | Recurrence | Comments                                                                          |
| <b>Laser-PDT</b>                                                                        | Yan et al, 2020[19]     | Case report                   | 2              | Superficial curettage followed by 3 and 8 sessions of ALA-PDT every 2 weeks with a 635 nm laser | CR: 100%           | N/A                    | 12 and 24 months | No         | -                                                                                 |
|                                                                                         | Wang et al, 2022[20]    | Case report                   | 1              | Single-dose Intravenous Hiporfin at doses of 5                                                  | Yes                | Yes                    | 53 days          | No         | 600 ul of 2 mg/ml hiporfin solution injected intralesionally 3                    |

|               |                                |                      |                     |                                                                               |     |     |         |     |                                                                                                                   |
|---------------|--------------------------------|----------------------|---------------------|-------------------------------------------------------------------------------|-----|-----|---------|-----|-------------------------------------------------------------------------------------------------------------------|
|               |                                |                      |                     | mg/kg followed by two irradiations (at 48 and 72 h) with 630 nm laser.        |     |     |         |     | hours before each irradiation                                                                                     |
|               | Liang et al, 2020[21]          | Case report          | 1                   | 4 sessions of CO <sup>2</sup> laser + ALA-PDT every week                      | Yes | N/A | 3 years | No  | -                                                                                                                 |
| <b>PDT</b>    | Fargnoli et al, 2015[22]       | Case report          | 1                   | 2 sessions of MAL-PDT                                                         | Yes | Yes | 2 years | No  | -                                                                                                                 |
| <b>IMI</b>    | Pentangelo et al, 2021[4]      | Case report          | 1                   | IMI 5% daily for 2 weeks and then once a week.                                | Yes | N/A | 2 years | No  | -                                                                                                                 |
| <b>IL-MTX</b> | Salido-Vallejo et al, 2016[24] | Retrospective cohort | 43 (5 in lower lip) | A single dose of intralesional MTX (syringes of 25 mg/ml) previous to surgery | No  | N/A | N/A     | N/A | Mean volume reduction of 0.52 cm <sup>2</sup> before surgery. IL-MTX shown to avoid complex surgeries in lip SCC. |

|                                                                      |                               |                      |                       |                                                                                                        |                              |                               |                       |                   |                                                                                                        |
|----------------------------------------------------------------------|-------------------------------|----------------------|-----------------------|--------------------------------------------------------------------------------------------------------|------------------------------|-------------------------------|-----------------------|-------------------|--------------------------------------------------------------------------------------------------------|
|                                                                      | Bergón-Sendín et al, 2019[25] | Prospective study    | 10                    | 2 doses of 20 mg of IL-MTX                                                                             | CR: 30%<br>PR: 70%           | N/A                           | N/A                   | N/A               | Mean reduction of 57.3% of major diameter and 68.2% of minor diameter                                  |
| <b>Intraarterial chemotherapy</b>                                    | Wu et al, 2014[26]            | Retrospective study  | 21                    | Initial intraarterial daily 50 mg of MTX (mean 8 days) followed by weekly 25 mg of MTX (mean 10 weeks) | CR: 62%<br>PR: 33%<br>NR: 5% | 57.1%                         | 69 months             | 38.4%             | 12 of 13 patients with clinical CR showed no histological evidence of tumour. Minimal systemic effects |
|                                                                      | Yokota et al, 2017[27]        | Case report          | 1                     | Intraarterial weekly 100 mg/m <sup>2</sup> of cisplatin for 5 weeks                                    | Yes                          | Yes                           | 5 years               | No                | Minimal systemic effects                                                                               |
| <b>Topical and intralesional therapy in perioral lentigo maligna</b> |                               |                      |                       |                                                                                                        |                              |                               |                       |                   |                                                                                                        |
| <b>Therapeutic modality</b>                                          | <b>References</b>             | <b>Type of study</b> | <b>Nº of patients</b> | <b>Initial regimen</b>                                                                                 | <b>Clinical clearance</b>    | <b>Histological clearance</b> | <b>Mean follow-up</b> | <b>Recurrence</b> | <b>Comments</b>                                                                                        |
| <b>Intralesional interferon</b>                                      | Cornejo et al, 2000[66]       | Case series          | 1 (perioral location) | 3 million UI of                                                                                        | Yes                          | N/A                           | 25 months             | No                | -                                                                                                      |

|                                                                                                                                                                                                                                                                                                                                   |  |  |  |                                                                          |  |  |  |  |  |  |
|-----------------------------------------------------------------------------------------------------------------------------------------------------------------------------------------------------------------------------------------------------------------------------------------------------------------------------------|--|--|--|--------------------------------------------------------------------------|--|--|--|--|--|--|
|                                                                                                                                                                                                                                                                                                                                   |  |  |  | intralesional<br>interferon-<br>alpha thrice<br>weekly up to<br>29 doses |  |  |  |  |  |  |
| <p><b>ALA:</b> aminolevulinic acid. <b>CR:</b> complete response. <b>IL-MTX:</b> intralesional methotrexate. <b>IM:</b> ingenol mebutate. <b>IMI:</b> imiquimod. <b>MAL:</b> methyl-aminolevulinic acid. <b>NR:</b> non-response. <b>PDT:</b> photodynamic therapy. <b>PR:</b> partial response. <b>5-FU:</b> 5-fluorouracil.</p> |  |  |  |                                                                          |  |  |  |  |  |  |



**Table S2: Studies using topical and intralesional therapy for periocular cutaneous cancer (including basal cell carcinoma, actinic keratosis squamous cell carcinoma and lentigo maligna).**

| Topical and intralesional therapy in periocular cutaneous cancer      |                           |                   |                |                                       |                    |                        |                |            |                                                                                                                               |
|-----------------------------------------------------------------------|---------------------------|-------------------|----------------|---------------------------------------|--------------------|------------------------|----------------|------------|-------------------------------------------------------------------------------------------------------------------------------|
| Topical and intralesional therapy for periocular basal cell carcinoma |                           |                   |                |                                       |                    |                        |                |            |                                                                                                                               |
| Therapeutic modality                                                  | References                | Type of study     | N° of patients | Initial regimen                       | Clinical clearance | Histological clearance | Mean follow-up | Recurrence | Comments                                                                                                                      |
| IMI                                                                   | De Macedo et al, 2015[30] | Prospective study | 24             | IMI 5% 5 times a week for 8-16 weeks. | CR: 89.5%          | CR: 89.5%              | 39.5 months    | 5.9%       | Nodular subtype. 5 patients interrupted treatment. Histological response of 100% after 3 years for lesions smaller than 1 cm. |
|                                                                       | Prokosch et al, 2011[31]  | Prospective study | 5              | IMI 5% 5 times a week for 6 weeks     | CR: 100%           | N/A                    | 7 years        | 0%         | Nodular subtype. 1 patient interrupted treatment.                                                                             |

|      |                               |                     |                |                                                        |                                   |          |                 |     |                                                                                   |
|------|-------------------------------|---------------------|----------------|--------------------------------------------------------|-----------------------------------|----------|-----------------|-----|-----------------------------------------------------------------------------------|
|      | García-Martín et al, 2011[32] | Clinical study      | 15             | IMI 5% 5 times a week for 6 weeks                      | CR: 100%                          | CR: 100% | 24 months       | 0%  | Nodular subtype. Worse tolerated than radiotherapy but better functional results. |
|      | Carneiro et al, 2010[33]      | Case series         | 8 (10 lesions) | IMI 5% 5 times a week for 8-16 weeks                   | CR: 80%                           | CR: 80%  | 11.8 months     | 0%  | Nodular subtype                                                                   |
|      | Leppäla et al, 2007[34]       | Case series         | 4              | IMI 5% 5 times a week for 6 weeks                      | CR: 100%                          | CR: 100% | 26 weeks        | 0%  | Nodular subtype                                                                   |
|      | Blasi et al, 2005[35]         | Case series         | 2              | IMI 5% 3 times a week for 12 and 8 weeks, respectively | CR: 100%                          | N/A      | 1 year          | No  | Nodular subtype                                                                   |
|      | Choontanom et al, 2006[36]    | Case series         | 5              | IMI 5% 5 times a week for 6 weeks                      | CR: 80%                           | N/A      | 3 years         | 0%  | Nodular subtype. Mean diameter: 10 mm                                             |
|      | Ross et al, 2010[37]          | Case series         | 2              | IMI 5% 5 times a week for 6 weeks                      | CR: 100%                          | N/A      | 12 and 9 months | No  | -                                                                                 |
| 5-FU | Singh et al, 2021[40]         | Retrospective study | 14             | 5-FU 1% Twice daily for up to 6 weeks                  | CR: 57.1%<br>PR: 28.5%<br>NR: 14% | N/A      | 12 months       | N/A | 53.3% Nodular, 36.7%                                                              |

|                         |                            |                     |    |                                                                                               |                   |                       |           |       |                                                                                                                                          |
|-------------------------|----------------------------|---------------------|----|-----------------------------------------------------------------------------------------------|-------------------|-----------------------|-----------|-------|------------------------------------------------------------------------------------------------------------------------------------------|
|                         |                            |                     |    | months until response                                                                         | (after 12 months) |                       |           |       | superficial, 10% basosquamous.                                                                                                           |
| <b>PDT</b>              | Cerman et al, 2015[28]     | Systematic review   | 75 | Variable number of sessions (typically 2-3; range 1-12)                                       | CR: 77%           | N/A                   | 23 months | 29.3% | MAL had better CR rates than ALA (87% vs 42%)                                                                                            |
| <b>Laser-PDT</b>        | Li et al, 2019[44]         | Case series         | 8  | PDT using 635 nm laser and 5-ALA 10% as a photosensitizer                                     | CR: 100%          | CR: 100%              | 2.8 years | 0%    | At least an infiltrative BCC is mentioned                                                                                                |
| <b>Local interferon</b> | Leis-Dosil et al, 2014[46] | Case report         | 1  | Interferon alpha ophthalmic 4 droplets a day (1 million UI per droplet) for 4 months          | Yes               | N/A                   | 3 years   | No    | -                                                                                                                                        |
|                         | Fenton et al, 2002[47]     | Retrospective study | 11 | Intralesional interferon alpha, 3 million units thrice a week for 2 weeks (total: 18 million) | CR: 100%          | CR: 100% (8 patients) | 12 months | No    | Out of 11 tumours, 10 had been previously treated with surgery with affected margins, and 7 belonged to high-risk histological subtypes. |

|                                                                                  |                       |                      |                                  |                                                                                                                                                   |                           |                               |                       |                   |                                                                             |
|----------------------------------------------------------------------------------|-----------------------|----------------------|----------------------------------|---------------------------------------------------------------------------------------------------------------------------------------------------|---------------------------|-------------------------------|-----------------------|-------------------|-----------------------------------------------------------------------------|
| <b>Local chemotherapy</b>                                                        | Meyer et al, 2015[48] | Retrospective study  | 3                                | Intralesional bleomycin 1 UI/ml together with lignocaine 2% in a ratio of 4:1, 4 to 8 cycles in 6 to 12 months                                    | CR: 100%                  | N/A                           | 4 years               | No                | -                                                                           |
|                                                                                  | Kis et al, 2019[49]   | Case series          | 12                               | 1 to 5 electroporation sessions using 250-1000 UI/cm <sup>2</sup> of intralesional bleomycin (3 patients) or 15000 UI/m <sup>2</sup> (9 patients) | CR: 100%                  | CR: 100% (11 patients)        | 25.3 months           | 0%                | 3 cases of ectropion due to post-procedure scar needed surgical correction. |
| <b>Topical and intralesional therapy for periocular squamous cell neoplasias</b> |                       |                      |                                  |                                                                                                                                                   |                           |                               |                       |                   |                                                                             |
| <b>Therapeutic modality</b>                                                      | <b>References</b>     | <b>Type of study</b> | <b>Nº of patients</b>            | <b>Initial regimen</b>                                                                                                                            | <b>Clinical clearance</b> | <b>Histological clearance</b> | <b>Mean follow-up</b> | <b>Recurrence</b> | <b>Comments</b>                                                             |
| <b>5-FU</b>                                                                      | Couch et al, 2012[51] | Retrospective study  | 14 patients (13 AKs and 1 Bowen) | 5-FU 5% Twice daily for 2 weeks, one initial cycle and repetition if partial response, recurrence                                                 | CR: 71,4%%<br>PR: 28,5%   | N/A                           | 36.6 months           | 30%               | -                                                                           |

|            |                          |                     |                                     |                                                                              |                |                |           |    |                                                                                                                                         |
|------------|--------------------------|---------------------|-------------------------------------|------------------------------------------------------------------------------|----------------|----------------|-----------|----|-----------------------------------------------------------------------------------------------------------------------------------------|
|            | Sharkawi et al, 2011[52] | Case report         | 1 (Bowen)                           | 5-FU 5% twice daily for 6 weeks                                              | Yes            | N/A            | 3 years   | No | -                                                                                                                                       |
| <b>IMI</b> | Cannon et al, 2011[53]   | Retrospective study | 47 patients (37 AK, 7 Bowen, 3 BCC) | IMI 5% thrice a week for 4-6 weeks                                           | CR: 72.3%      | N/A            | 16 weeks  | 0% | 9 patients needed interruption of treatment, starting again in 6. One patient lost to follow-up. Complete resolution of adverse effects |
|            | Toso et al, 2022[54]     | Case report         | 1                                   | IMI 3.75% daily over two cycles of 2 course of 2 weeks each (total: 8 weeks) | Yes (complete) | N/A            | 6 months  | No | -                                                                                                                                       |
| <b>PDT</b> | Rossi et al, 2004[56]    | Case report         | 1 SCC                               | A single session of 20% ALA-PDT irradiated with an incoherent light source   | Yes (complete) | N/A            | 6 months  | No | -                                                                                                                                       |
|            | Calista et al, 2008[58]  | Case report         | 1 in situ SCC (Bowen)               | Two sessions of 16% ALA-PDT after curettage, irradiated with                 | Yes (complete) | Yes (complete) | 30 months | No | -                                                                                                                                       |

|                                       |                                 |             |         |                                                                                                           |                |                             |            |     |                                                           |
|---------------------------------------|---------------------------------|-------------|---------|-----------------------------------------------------------------------------------------------------------|----------------|-----------------------------|------------|-----|-----------------------------------------------------------|
|                                       |                                 |             |         | diode lamp, one week apart                                                                                |                |                             |            |     |                                                           |
| <b>Laser-PDT</b>                      | Sunohara et al, 2012[57]        | Case report | 1 Bowen | Two sessions of ALA-PDT irradiated with pulsed dye laser                                                  | Yes (complete) | Yes (complete)              | 1 month    | No  | -                                                         |
| <b>PDT + imiquimod 5%</b>             | Toledo-Arberola et al, 2012[55] | Case report | 1 AK    | 2 red-light PDT sessions 2 weeks apart with 16% ALA followed by IMI 5% thrice a week for 4 weeks          | Yes (complete) | Yes (complete)              | N/A        | N/A | Immediate response is described after finishing treatment |
| <b>Diclofenac</b>                     | Batra et al, 2012[59]           | Case series | 4 AK    | Diclofenac 3% gel twice daily for 1 to 4 months                                                           | CR: 100%       | N/A                         | 8.3 months | 50% | -                                                         |
| <b>Other intralesional treatments</b> | Carriere et al, 2020[60]        | Case report | 1 SCC   | 13 cycles of IL-MTX (first 3 cycles of 25 mg, followed by 10 cycles of 50 mg), administered every 2 weeks | Yes (partial)  | N/A                         | 6 months   | N/A | Sustained tumoral volume reduction of 69%                 |
|                                       | Calista et al, 2002[61]         | Case report | 1 SCC   | A single dose of 7.5 mg of intralesional cidofovir                                                        | Yes (complete) | Yes (complete at 12 months) | 24 months  | No  | -                                                         |

|                                                                  | Requena et al, 1990[62] | Case report       | 1 SCC          | 4 weekly cycles of 50 mg of intralesional 5-FU, in addition to topical 5-FU 5% once or twice daily and radiotherapy                                                                | No                     | No                     | N/A            | N/A        | After therapeutic failure, the patient required extensive surgery, with exenteration and no recurrence after 24 months |
|------------------------------------------------------------------|-------------------------|-------------------|----------------|------------------------------------------------------------------------------------------------------------------------------------------------------------------------------------|------------------------|------------------------|----------------|------------|------------------------------------------------------------------------------------------------------------------------|
| Topical and intralesional therapy for periocular lentigo maligna |                         |                   |                |                                                                                                                                                                                    |                        |                        |                |            |                                                                                                                        |
| Therapeutic modality                                             | References              | Type of study     | Nº of patients | Initial regimen                                                                                                                                                                    | Clinical clearance     | Histological clearance | Mean follow-up | Recurrence | Comments                                                                                                               |
| IMI                                                              | Neumann et al, 2023[38] | Systematic review | 21             | Variable regimens of IMI 5% ranging from thrice weekly to once daily during 1 to 24 months; alone (13) or combined with other modalities ( 6 surgery and/or cryotherapy, 2 topical | CR: 85.7%<br>PR: 14.2% | CR: 92% (12 patients)  | 21.9 months    | No         | -                                                                                                                      |

|                                                                                                                                                                                                                                                                                                                                                                                                    |                                |             |                                      |                                                                                                                            |                |                |           |    |                                                                                                            |
|----------------------------------------------------------------------------------------------------------------------------------------------------------------------------------------------------------------------------------------------------------------------------------------------------------------------------------------------------------------------------------------------------|--------------------------------|-------------|--------------------------------------|----------------------------------------------------------------------------------------------------------------------------|----------------|----------------|-----------|----|------------------------------------------------------------------------------------------------------------|
|                                                                                                                                                                                                                                                                                                                                                                                                    |                                |             |                                      | chemotherapy for conjunctival involvement)                                                                                 |                |                |           |    |                                                                                                            |
|                                                                                                                                                                                                                                                                                                                                                                                                    | Misiak-Galazka et al, 2022[65] | Case report | 1                                    | 2 cycles of IMI 5% 5 times a week during 5 weeks, 2 months apart                                                           | Yes (complete) | N/A            | 2 years   | No | First cycle interrupted due to intense inflammation, the same duration was implemented in the second cycle |
| Local interferon                                                                                                                                                                                                                                                                                                                                                                                   | Cornejo et al, 2000[66]        | Case series | 1 (periocular location)              | 6 million UI of interferon-alpha intralesionally thrice weekly for 5 weeks (15 doses)                                      | Yes (complete) | N/A            | 19 months | No | -                                                                                                          |
|                                                                                                                                                                                                                                                                                                                                                                                                    | Carucci et al, 2000[67]        | Case report | 1 (involving upper and lower eyelid) | 3 million UI of interferon-alpha intralesionally in each eyelid, thrice weekly, for a total of 39 million UI in each site. | Yes (complete) | Yes (complete) | N/A       | No | Previously treated with excisional surgery. Follow-up time not specified.                                  |
| <b>AK:</b> actinic keratosis. <b>ALA:</b> aminolevulinic acid. <b>BCC:</b> basal cell carcinoma. <b>CR:</b> complete response. <b>IL-MTX:</b> intralesional methotrexate. <b>IMI:</b> imiquimod. <b>MAL:</b> methyl-aminolevulinic acid. <b>NR:</b> non-response. <b>PDT:</b> photodynamic therapy. <b>PR:</b> partial response. <b>SCC:</b> squamous cell carcinoma. <b>5-FU:</b> 5-fluorouracil. |                                |             |                                      |                                                                                                                            |                |                |           |    |                                                                                                            |
